# Supplementary material
Source: HighWire-hosted journal article supplement (https://erj.ersjournals.com/content/52/1/1800296)
Supplement: inline-supplementary-material-1 [file inline-supplementary-material-1.pdf]

Supplementary material

A)

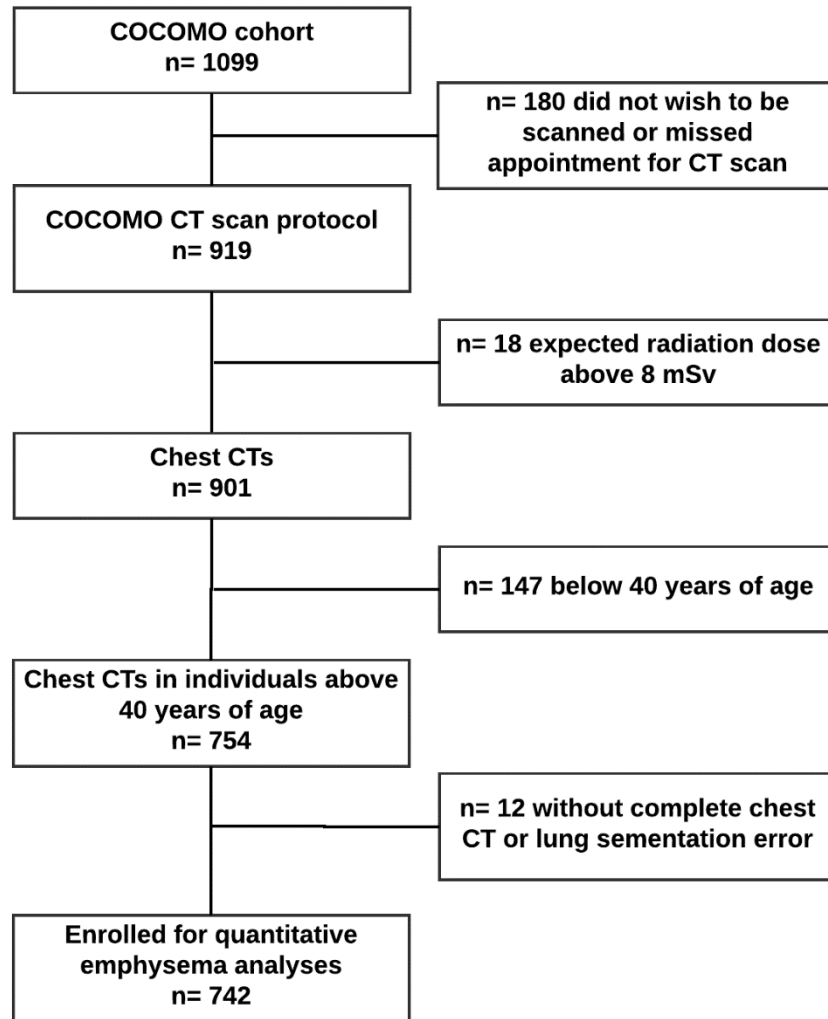

B)

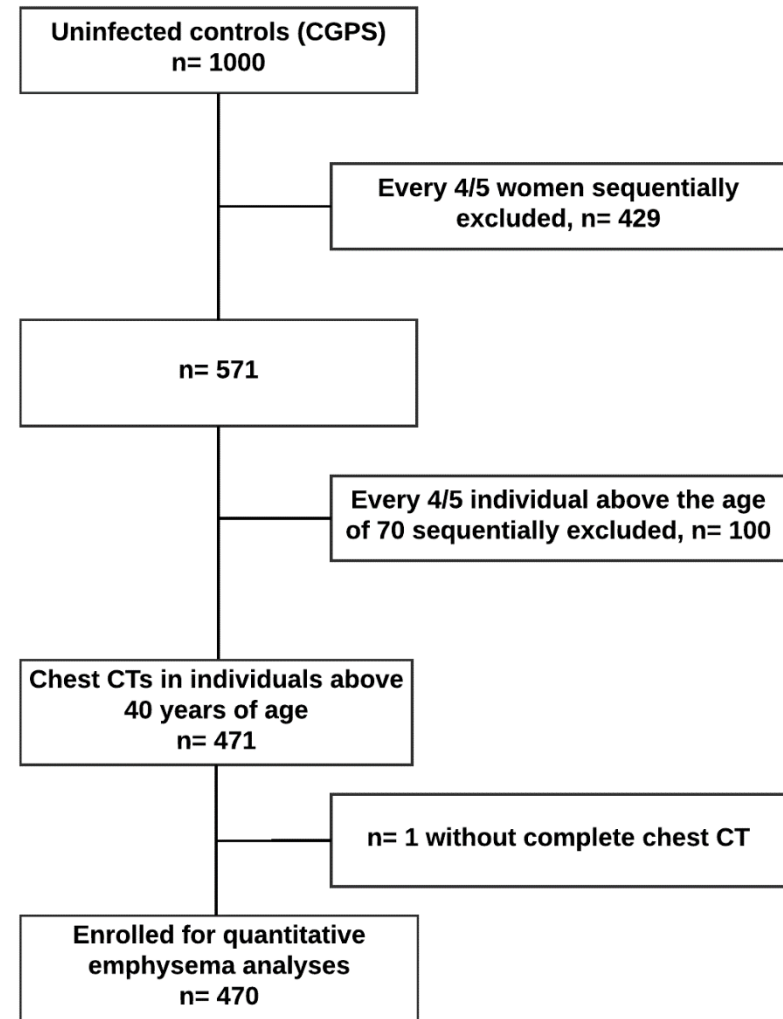

Abbreviations: CGPS, Copenhagen General Population Study; COCOMO, Copenhagen Co-morbidity in HIV infection Study; CT, computed tomography.
